# Supplementary material for: The Frontal Assessment Battery (FAB) and its sub-scales: validation and updated normative data in an Italian population sample
Source: Springer Nature journal article supplement (doi:10.1007/s10072-021-05392-y), 2021-06-29
Supplement: MOESM1 [file 19312084]

### Frontal Assessment Battery (FAB) <sup>1,2,3</sup>

Aiello, E.N., Esposito, A., Gramegna, C., Gazzaniga, V., Zago, S., Difonzo, T., Appollonio, I., Bolognini, N. (2021). The Frontal Assessment Battery (FAB) and its sub-scales: validation and updated normative data in an Italian population sample. *Neurological Sciences*, 1-6. <https://doi.org/10.1007/s10072-021-05392-y>

|                                                                                                                                                                                                                                                                                                                                                                                                                                                                                                                                                                                                                                                                                                                                      |              |              |
|--------------------------------------------------------------------------------------------------------------------------------------------------------------------------------------------------------------------------------------------------------------------------------------------------------------------------------------------------------------------------------------------------------------------------------------------------------------------------------------------------------------------------------------------------------------------------------------------------------------------------------------------------------------------------------------------------------------------------------------|--------------|--------------|
| <p><b>1.a.</b> “In che cosa sono simili una banana e un’arancia?” Risposta: _____ (“frutta”=1 pt.)<br/> <i>Note:</i> in caso di fallimento totale “non sono simili” o di fallimento parziale “entrambe hanno la buccia” aiutare il S.: “la banana e l’arancia sono entrambe [...]” ma assegnare 0 a questa risposta; non aiutare per i successivi due <i>item</i> (1.b e 1.c).</p>                                                                                                                                                                                                                                                                                                                                                   |              |              |
| <p><b>1.b.</b> “In che cosa sono simili un tavolo e una sedia?” Risposta: _____ (“mobili”=1 pt.)</p>                                                                                                                                                                                                                                                                                                                                                                                                                                                                                                                                                                                                                                 |              |              |
| <p><b>1.c.</b> “In che cosa sono simili un tulipano, una rosa e una margherita?” Risposta: _____ (“fiori”=1 pt.) <span style="float: right;">[__/3]</span></p>                                                                                                                                                                                                                                                                                                                                                                                                                                                                                                                                                                       |              |              |
| <p><b>2.</b> “Dica il maggior numero possibile di parole che cominciano con la lettera “S”, qualsiasi parola eccetto cognomi o nomi propri.” <i>Note:</i> la prova dura 60”; se il Soggetto (S.) non dà nessuna risposta nei primi 5”, dire: “Per esempio, “serpente””. Se il S. si ferma per oltre 10”, stimolarlo dicendo: “Qualsiasi parola che cominci con la lettera “S””. Ripetizioni o variazioni (ad es. scarpa, scarpone), cognomi o nomi propri non sono considerate risposte corrette.<br/>         Produzione: _____<br/>         _____<br/>         _____</p>                                                                                                                                                           |              |              |
| <p><b>Attribuzione del punteggio:</b> 3=più di 9 parole; 2=6-9 parole; 1=3-5 parole; 0=meno di 3 parole <span style="float: right;">[__/3]</span></p>                                                                                                                                                                                                                                                                                                                                                                                                                                                                                                                                                                                |              |              |
| <p><b>3.</b> “Guardi con attenzione quello che faccio.” l’Esaminatore (E.) seduto di fronte al S. effettua 3 volte, da solo, con la mano sinistra la serie di Luria <i>pugno-taglio-piatto</i>. “Ora faccia lo stesso anche lei prima con me, poi da solo”. l’E. effettua 3 volte la stessa serie con il S., poi gli dice: “continui da solo”.<br/> <b>Attribuzione del punteggio:</b> 3=il S. effettua da solo, correttamente, 6 serie consecutive; 2=il S. effettua da solo, correttamente, almeno 3 serie consecutive; 1=il S. sbaglia da solo, ma effettua correttamente almeno 3 serie consecutive con l’E.; 0=il S. non riesce a effettuare 3 serie consecutive neppure con l’E. <span style="float: right;">[__/3]</span></p> |              |              |
| <p><b>4.</b> “Batta due volte quando io batto una volta.” <i>Note:</i> per essere sicuri che il S. abbia capito le istruzioni, si effettua una serie di 3 prove: “1-1-1”; Risposta: __-__-__<br/>         “Batta una volta quando io batto due volte.” <i>Note:</i> per essere sicuri che il S. abbia capito le istruzioni, si effettua una serie di 3 prove: “2-2-2”; Risposta: __-__-__<br/>         L’E. effettua la seguente serie: 1-1-2-1-2-2-2-1-1-2; Risposta: __-__-__-__-__-__-__-__-__-__</p>                                                                                                                                                                                                                             |              |              |
| <p><b>Attribuzione del punteggio:</b> 3=0 errori; 2=1-2 errori; 1=3 errori; 0=più di 3 errori. <span style="float: right;">[__/3]</span></p>                                                                                                                                                                                                                                                                                                                                                                                                                                                                                                                                                                                         |              |              |
| <p><b>5.</b> “Batta una volta quando io batto una volta.” <i>Note:</i> per essere sicuri che il S. abbia capito le istruzioni, si effettua una serie di 3 prove: “1-1-1”; Risposta: __-__-__<br/>         “Non batte quando io batto due volte.” <i>Note:</i> per essere sicuri che il S. abbia capito le istruzioni, si effettua una serie di 3 prove: “2-2-2”; Risposta: __-__-__<br/>         L’E. effettua la seguente serie: 1-1-2-1-2-2-2-1-1-2; Risposta: __-__-__-__-__-__-__-__-__-__</p>                                                                                                                                                                                                                                   |              |              |
| <p><b>Attribuzione del punteggio:</b> 3=0 errori; 2=1-2 errori; 1=3 errori; 0=più di 3 errori. <span style="float: right;">[__/3]</span></p>                                                                                                                                                                                                                                                                                                                                                                                                                                                                                                                                                                                         |              |              |
| <p><b>6.</b> l’E. è seduto di fronte al S. Mettere le mani del S. con le palme in alto, appoggiate sulle ginocchia. Senza dire nulla e senza guardare il S., l’E. porta le sue mani vicino a quelle del S. e ne tocca le palme, contemporaneamente da ambo i lati, osservando se il S. spontaneamente le afferra. Se il S. le afferra, l’E. prova di nuovo dopo avergli detto: “Non prenda le mie mani”.<br/> <b>Attribuzione del punteggio:</b> 3=il S. non afferra le mani dell’E.; 2=il S. esita e chiede cosa deve fare; 1=il S. afferra le mani senza esitazione; 0=il S. afferra le mani dell’E. anche dopo che gli è stato chiesto di non farlo. <span style="float: right;">[__/3]</span></p>                                |              |              |
| <b>FAB-1 (item 1 e 2): PG=__/6</b>                                                                                                                                                                                                                                                                                                                                                                                                                                                                                                                                                                                                                                                                                                   | <b>PC=__</b> | <b>PE=__</b> |
| <b>FAB-2 (item 3 e 4): PG=__/6</b>                                                                                                                                                                                                                                                                                                                                                                                                                                                                                                                                                                                                                                                                                                   | <b>PC=__</b> | <b>PE=__</b> |
| <b>FAB-3 (item 5 e 6): PG=__/6</b>                                                                                                                                                                                                                                                                                                                                                                                                                                                                                                                                                                                                                                                                                                   | <b>PC=__</b> | <b>PE=__</b> |
| <b>FAB-tot.: PG=__/18</b>                                                                                                                                                                                                                                                                                                                                                                                                                                                                                                                                                                                                                                                                                                            | <b>PC=__</b> | <b>PE=__</b> |

<sup>1</sup> Dubois, B., Slachevsky, A., Litvan, I., Pillon, B. (2000). The FAB: a frontal assessment battery at bedside. *Neurology*, 55, 1621-1626.

<sup>2</sup> Appollonio, I., Leone, M., Isella, V., Piamarta, F., Consoli, T., Villa, M.L., Forapani, E., Russo, A., Nichelli, P. (2005). The Frontal Assessment Battery (FAB): normative values in an Italian population sample. *Neurological Sciences*, 26, 108-116.

<sup>3</sup> Barletta-Ghidolfi, C., Gasparini, F., Ghidoni, E. (2011). Kit del Neuropsicologo Italiano. Società Italiana di Neuropsicologia.
